# Supplementary material for: The Impact of Limited Previous Motor Experience on Action Possibility Judgments in People with Spinal Muscle Atrophy
Source: MDPI journal article supplement (doi:10.3390/brainsci13091256), 2023-08-29
Supplement: s1 [file s1]

Supplementary File

# Investigating the relationship between sensorimotor characteristics and predicted movement times

Start of Block: Informed Consent

Welcome to the research study!

We are interested in understanding [STUDY TOPIC]. For this study, you will be presented with information relevant to [STUDY TOPIC]. Then, you will be asked to answer some questions about it. Your responses will be kept completely confidential.<sup>[1][2][3]</sup><sub>[SEP][SEP]</sub>

The study should take you around [SURVEY DURATION IN MINUTES] to complete. You will receive [INCENTIVE] for your participation.<sup>[1][2][3]</sup><sub>[SEP][SEP]</sub> Your participation in this research is voluntary. You have the right to withdraw at any point during the study. The Principal Investigator of this study can be contacted at [NAME/ EMAIL ADDRESS].<sup>[1]</sup><sub>[SEP]</sub>

By clicking the button below, you acknowledge:

Your participation in the study is voluntary. You are 18 years of age. You are aware that you may choose to terminate your participation at any time for any reason.

- I consent, begin the study
- I do not consent, I do not wish to participate

What type of device are you using (Computer, Tablet, Phone?). If you can please specify the model (e.g., 2013 Lenovo Thinkpad)

---

What is the estimated screen size of the device (e.g., 13 inches) ?

---

What is your Age in Years (e.g., 25)

---

What is your sex (e.g., Female, Male, prefer not to disclose)?

---

Please indicate which hand you would use for the following activities:

|                                                          | Right                 | Left                  | Both                  | None                  |
|----------------------------------------------------------|-----------------------|-----------------------|-----------------------|-----------------------|
| Using an assistive device (e.g. wheel chair controller). | <input type="radio"/> | <input type="radio"/> | <input type="radio"/> | <input type="radio"/> |
| Pointing to a location                                   | <input type="radio"/> | <input type="radio"/> | <input type="radio"/> | <input type="radio"/> |
| Using a mouse                                            | <input type="radio"/> | <input type="radio"/> | <input type="radio"/> | <input type="radio"/> |
| Holding keys/objects                                     | <input type="radio"/> | <input type="radio"/> | <input type="radio"/> | <input type="radio"/> |
| Using a writing device or tablet                         | <input type="radio"/> | <input type="radio"/> | <input type="radio"/> | <input type="radio"/> |

Please view the following video for the instructions

- I have viewed the instructions

Page Break

Please note your participant ID: **P\${rand://int/1:9}\${rand://int/1:9}\${rand://int/1:9}\${rand://int/1:9}**  
**You will have to enter it to complete the experiment**

**\${date://CurrentDate/SL} \${date://CurrentTime/TL}**

End of Block: Informed Consent

**Table S1.** *An example participants' scoring system on the adapted Spinal Muscular Atrophy Health Index*

| How much does the following impact your life now (Score)                    | I don't experience this (0) | I experience this but it does not affect my life (1) | It affects my life a little (2) | It affects my life moderately (3) | It affects my life very much (4) | It affects my life severely (5) |
|-----------------------------------------------------------------------------|-----------------------------|------------------------------------------------------|---------------------------------|-----------------------------------|----------------------------------|---------------------------------|
| Difficulty lifting objects                                                  |                             |                                                      |                                 |                                   |                                  | X                               |
| Arm weakness                                                                |                             |                                                      |                                 |                                   |                                  | X                               |
| Problems reaching things over your head                                     |                             |                                                      |                                 |                                   |                                  | X                               |
| Difficulty propping yourself up with your arms                              |                             |                                                      |                                 |                                   |                                  | X                               |
| Decreased arm and shoulder range of motion                                  |                             |                                                      |                                 |                                   |                                  | X                               |
| Shoulder weakness                                                           |                             |                                                      |                                 |                                   |                                  | X                               |
| Hand weakness                                                               |                             |                                                      |                                 |                                   |                                  | X                               |
| Difficulty doing things with your hands                                     |                             |                                                      |                                 |                                   |                                  | X                               |
| Impaired ability to open doors or drawers (Heaviness or grabbing the door?) |                             |                                                      |                                 |                                   |                                  | X                               |
| Difficulty washing your hair                                                |                             |                                                      |                                 |                                   |                                  | X                               |
| Weak hand grasp                                                             |                             |                                                      |                                 |                                   |                                  | X                               |
| Difficulty picking things up with your fingers                              |                             |                                                      |                                 |                                   |                                  | X                               |
| Difficulty maintaining personal cleanliness                                 |                             |                                                      |                                 |                                   |                                  | X                               |
| Dropping objects with your hands                                            |                             |                                                      |                                 |                                   |                                  | X                               |
| Difficulty holding a pen or pencil                                          |                             |                                                      |                                 |                                   |                                  | X                               |
| Difficulty moving small objects with your hands                             |                             |                                                      |                                 |                                   |                                  | X                               |
| Which of the following best describes how you get around? Ex: Walk          | I use a wheelchair. (5)     |                                                      |                                 |                                   |                                  |                                 |

|                                                                  |                          |
|------------------------------------------------------------------|--------------------------|
| independently, cane, walker, wheelchair,<br>motorized scooter... |                          |
| Overall SMAHI score                                              | $(5 \times 16) / 16 = 5$ |

*Note.* Adapted from *The Spinal Muscular Atrophy Health Index* (Heatwole et al., 2015).
